# Supplementary material for: Altered Acylcarnitine Metabolism Is Associated With an Increased Risk of Atrial Fibrillation
Source: PubMed Central journal article supplement — J Am Heart Assoc. 2020 Oct 20;9(21):e016737. doi: 10.1161/JAHA.120.016737 (PMC7763428; doi:10.1161/jaha.120.016737), 2020-10-20
Supplement: JAH3-9-e016737-s001.pdf [file JAH3-9-e016737-s001.pdf]

# **SUPPLEMENTAL MATERIAL**

**Table S1. In house metabolite library.**

| <b>Metabolites</b>                      | <b>% excluded<br/>before<br/>analysis</b> | <b>mass (m/z)</b> | <b>retention<br/>time<br/>(min)</b> | <b>HMDB ID</b> | <b>Normalization<br/>method</b> |
|-----------------------------------------|-------------------------------------------|-------------------|-------------------------------------|----------------|---------------------------------|
| Urea                                    | 0.2%                                      | 60.032            | 1.98                                | HMDB00294      | LOESS                           |
| Trimethylamine-N-oxide                  | 3.2%                                      | 75.068            | 4.28                                | HMDB00925      | LOESS                           |
| Alanine                                 | 0.2%                                      | 89.048            | 7.5                                 | HMDB00161      | Internal Standard               |
| Sarcosine                               | 11.0%                                     | 89.048            | 7.27                                | HMDB00271      | LOESS                           |
| Dimethylglycine                         | 1.0%                                      | 103.063           | 6.59                                | HMDB00092      | Internal Standard               |
| 2-Aminoisobutyric acid                  | 0.5%                                      | 103.064           | 6.9                                 | HMDB01906      | LOESS                           |
| Choline                                 | 0.2%                                      | 104.108           | 4.01                                | HMDB00097      | Internal Standard               |
| Serine                                  | 0.3%                                      | 105.043           | 8.56                                | HMDB00187      | Internal Standard               |
| Creatinine                              | 0.2%                                      | 113.059           | 4.55                                | HMDB00562      | LOESS                           |
| Proline                                 | 0.4%                                      | 115.063           | 6.64                                | HMDB00162      | Internal Standard               |
| Guanidineacetate                        | 0.0%                                      | 117.054           | 7.56                                | HMDB00128      | LOESS                           |
| Betaine                                 | 0.4%                                      | 118.087           | 6.14                                | HMDB00043      | Internal Standard               |
| Valine                                  | 0.0%                                      | 118.087           | 6.57                                | HMDB00883      | Internal Standard               |
| Threonine                               | 0.6%                                      | 119.058           | 7.85                                | HMDB00167      | Internal Standard               |
| Nicotinamide                            | 0.6%                                      | 122.048           | 1.36                                | HMDB01406      | Internal Standard               |
| Taurine                                 | 0.2%                                      | 125.015           | 6.62                                | HMDB00251      | Internal Standard               |
| Pyroglutamate                           | 0.7%                                      | 129.043           | 2.56                                | HMDB00267      | LOESS                           |
| N.Methylproline                         | 6.3%                                      | 129.079           | 6.25                                | HMDB94696      | LOESS                           |
| Pipecolate                              | 1.8%                                      | 129.079           | 6.84                                | HMDB00716      | LOESS                           |
| Creatine                                | 0.1%                                      | 131.07            | 7.19                                | HMDB00064      | LOESS                           |
| Isoleucine                              | 0.3%                                      | 131.095           | 6.09                                | HMDB00172      | Internal Standard               |
| Leucine                                 | 0.1%                                      | 131.095           | 5.92                                | HMDB00687      | Internal Standard               |
| Asparagine                              | 0.2%                                      | 132.053           | 8.7                                 | HMDB00168      | Internal Standard               |
| Ornithine                               | 0.3%                                      | 132.09            | 11.58                               | HMDB00214      | Internal Standard               |
| Hypoxanthine                            | 0.2%                                      | 136.039           | 3.8                                 | HMDB00157      | LOESS                           |
| Trigonelline                            | 5.9%                                      | 137.048           | 6.38                                | HMDB00875      | LOESS                           |
| Methylnicotinamide                      | 0.8%                                      | 137.071           | 4.96                                | HMDB03152      | Internal Standard               |
| Urocanate                               | 4.7%                                      | 138.042           | 2.38                                | HMDB00301      | LOESS                           |
| Proline betaine                         | 0.8%                                      | 143.095           | 6.21                                | HMDB04827      | LOESS                           |
| Glutamine                               | 0.1%                                      | 146.069           | 8.48                                | HMDB00641      | Internal Standard               |
| Lysine                                  | 0.2%                                      | 146.106           | 11.4                                | HMDB00182      | Internal Standard               |
| 4-<br>Trimethylammoniobutan<br>oic acid | 0.6%                                      | 146.118           | 4.58                                | HMDB01161      | LOESS                           |
| Glutamate                               | 0.2%                                      | 147.053           | 8.14                                | HMDB00148      | Internal Standard               |
| Methionine                              | 0.2%                                      | 149.051           | 6.32                                | HMDB00696      | Internal Standard               |
| N-Methyl-4-pyridone-3-<br>carboxamide   | 1.1%                                      | 152.058           | 1.92                                | HMDB04194      | LOESS                           |
| N-Methyl-2-pyridone-5-<br>carboxamide   | 1.00%                                     | 152.0586          | 1.72                                | NA             | LOESS                           |
| Homostachydrine                         | 2.3%                                      | 157.11            | 6.02                                | HMDB33433      | LOESS                           |
| Methyllysine                            | 0.0%                                      | 160.121           | 10.66                               | HMDB02038      | LOESS                           |

|                                      |        |         |       |             |                   |
|--------------------------------------|--------|---------|-------|-------------|-------------------|
| Carnitine                            | 1.4%   | 162.113 | 6.19  | HMDB00062   | Internal Standard |
| Methionine.S.oxide                   | 6.0%   | 165.046 | 8.23  | HMDB02005   | LOESS             |
| 7-Methylguanine                      | 0.3%   | 165.065 | 4.77  | HMDB00897   | LOESS             |
| Phenylalanine                        | 0.4%   | 165.079 | 5.88  | HMDB00159   | Internal Standard |
| 1-Methylhistidine                    | 0.4%   | 169.085 | 9.72  | HMDB00001   | LOESS             |
| 3-Methylhistidine                    | 2.3%   | 169.085 | 10.82 | HMDB00479   | LOESS             |
| Acetylorntithine                     | 0.7%   | 174.102 | 7.86  | HMDB03357   | LOESS             |
| Arginine                             | 0.2%   | 174.112 | 10.92 | HMDB00517   | Internal Standard |
| Dimethyllysine                       | 0.10%  | 174.137 | 9.95  | NA          | LOESS             |
| Citrulline                           | 0.3%   | 175.095 | 9.04  | HMDB00904   | Internal Standard |
| Cotinine                             | 71.10% | 176.095 | 1.33  | NA          | LOESS             |
| Hippurate                            | 2.4%   | 179.058 | 1.14  | HMDB00714   | LOESS             |
| Paraxanthine                         | 2.1%   | 180.065 | 1.33  | HMDB01860   | LOESS             |
| Tyrosine                             | 6.3%   | 181.074 | 6.64  | HMDB00158   | Internal Standard |
| Acisoga                              | 0.4%   | 184.121 | 1.63  | HMDB61384   | LOESS             |
| Histidine                            | 0.3%   | 188.127 | 10.56 | HMDB00177   | Internal Standard |
| Homoarginine                         | 0.3%   | 188.127 | 10.59 | HMDB00670   | LOESS             |
| NMMA                                 | 0.2%   | 188.127 | 10.2  | HMDB29416   | LOESS             |
| Kynurenate                           | 0.8%   | 189.043 | 5.06  | HMDB00715   | LOESS             |
| Homocitrulline                       | 3.3%   | 189.111 | 8.86  | HMDB00679   | LOESS             |
| Trimethyllysine                      | 1.0%   | 189.16  | 10.14 | HMDB01325   | LOESS             |
| Hydroxycotinine                      | 96.80% | 192.09  | 1.75  | NA          | LOESS             |
| Caffeine                             | 16.2%  | 194.08  | 1     | HMDB01847   | LOESS             |
| 5-Acetylamino-6-amino-3-methyluracil | 13.8%  | 198.075 | 4.61  | HMDB04400   | LOESS             |
| DMGV                                 | 1.7%   | 202.119 | 6.01  | HMDB0240212 | LOESS             |
| Asymmetric dimethylarginine          | 1.3%   | 202.143 | 9.52  | HMDB01539   | Internal Standard |
| Symmetric dimethylarginine           | 2.0%   | 202.143 | 9.51  | HMDB03334   | LOESS             |
| Tryptophan                           | 0.3%   | 204.09  | 5.93  | HMDB00929   | Internal Standard |
| Acylcarnitine C2:0                   | 0.3%   | 204.124 | 4.45  | HMDB00201   | Internal Standard |
| 3-Hydroxytrimethyllysine             | 0.7%   | 205.155 | 10.8  | HMDB01422   | LOESS             |
| Kynurenine                           | 0.3%   | 208.085 | 6     | HMDB00684   | LOESS             |
| Acetylarginine                       | 0.3%   | 216.122 | 7.08  | HMDB04620   | LOESS             |
| Acylcarnitine C3:0                   | 0.4%   | 218.139 | 4.06  | HMDB00824   | Internal Standard |
| Pantothenate                         | 1.2%   | 219.111 | 1.63  | HMDB00210   | LOESS             |
| Ergothioneine                        | 1.1%   | 229.088 | 7.35  | HMDB03045   | LOESS             |
| Acylcarnitine C4:0                   | 1.2%   | 232.154 | 3.63  | HMDB02013   | Internal Standard |
| Cystine                              | 0.1%   | 240.024 | 13.02 | HMDB00192   | LOESS             |
| Tiglylcarnitine                      | 2.9%   | 243.147 | 3.46  | HMDB02366   | LOESS             |
| Acylcarnitine C5:0                   | 0.6%   | 245.163 | 3.23  | HMDB00688   | LOESS             |
| Acylcarnitine C4:0-OH                | 23.90% | 247.142 | 4.7   | NA          | LOESS             |
| Glycerophosphocholine                | 0.5%   | 258.11  | 8.71  | HMDB00086   | LOESS             |
| Acylcarnitine C6:0                   | 0.7%   | 260.186 | 2.88  | HMDB00756   | LOESS             |
| Phenylacetylglutamine                | 0.6%   | 264.11  | 1.98  | HMDB06344   | LOESS             |
| Acetylcarnosine                      | 0.4%   | 268.117 | 8.04  | HMDB12881   | LOESS             |

|                         |       |         |      |             |                   |
|-------------------------|-------|---------|------|-------------|-------------------|
| 1-Methyladenosine       | 0.2%  | 281.113 | 6.46 | HMDB03331   | LOESS             |
| Piperine                | 1.50% | 285.137 | 0.85 | NA          | LOESS             |
| Acylcarnitine C8:1      | 0.6%  | 286.202 | 2.73 | HMDB13324   | LOESS             |
| Acylcarnitine C8:0      | 0.9%  | 288.217 | 2.49 | HMDB00791   | Internal Standard |
| 5-Methylthioadenosine   | 4.1%  | 297.09  | 2.08 | HMDB01173   | LOESS             |
| Acylcarnitine C9:0      | 0.7%  | 302.233 | 2.23 | HMDB13288   | LOESS             |
| Acylcarnitine C8:0-OH   | 0.5%  | 304.212 | 4.06 |             | LOESS             |
| Acylcarnitine C10:3     | 0.8%  | 310.202 | 2.42 |             | LOESS             |
| N2,N2-Dimethylguanosine | 0.5%  | 311.123 | 4.74 | HMDB04824   | LOESS             |
| Acylcarnitine C10:2     | 0.6%  | 312.217 | 2.44 |             | LOESS             |
| Acylcarnitine C10:1     | 1.0%  | 314.232 | 2.34 | HMDB13205   | LOESS             |
| Acylcarnitine C10:0     | 0.7%  | 316.249 | 2.18 | HMDB00651   | LOESS             |
| Acylcarnitine C11:1     | 0.3%  | 328.248 | 2.28 |             | LOESS             |
| Acylcarnitine C11:0     | 0.6%  | 330.263 | 2.14 | HMDB13321   | LOESS             |
| Acylcarnitine C10:0-OH  | 1.0%  | 332.244 | 3.52 |             | LOESS             |
| Acylcarnitine C12:2     | 1.0%  | 340.25  | 2.23 |             | LOESS             |
| Acylcarnitine C12:1     | 0.5%  | 342.263 | 2.16 | HMDB13326   | LOESS             |
| Acylcarnitine C12:0     | 0.4%  | 344.279 | 2.13 | HMDB02250   | LOESS             |
| Acylcarnitine C13:1     | 0.8%  | 356.279 | 2.1  |             | LOESS             |
| Acylcarnitine C13:0     | 0.8%  | 358.295 | 2.03 |             | LOESS             |
| Acylcarnitine C14:2     | 0.5%  | 368.28  | 2.08 | HMDB13331   | LOESS             |
| Acylcarnitine C14:1     | 0.4%  | 370.294 | 2.03 | HMDB0240588 | LOESS             |
| Acylcarnitine C14:0     | 0.4%  | 372.311 | 1.94 | HMDB05066   | Internal Standard |
| Acylcarnitine C16:1     | 0.4%  | 398.326 | 1.93 | HMDB13207   | LOESS             |
| 25-Hydroxyvitamin D3    | 0.7%  | 400.334 | 0.81 | HMDB03550   | LOESS             |
| Acylcarnitine C16:0     | 0.3%  | 400.343 | 1.85 | HMDB00222   | Internal Standard |
| Acylcarnitine C18:2     | 0.4%  | 424.346 | 1.87 |             | LOESS             |
| Acylcarnitine C18:1     | 0.3%  | 426.357 | 1.86 |             | LOESS             |
| Acylcarnitine C18:0     | 0.4%  | 428.372 | 1.84 | HMDB00848   | LOESS             |
| Beta-carotene           | 0.6%  | 536.438 | 0.83 | HMDB00561   | LOESS             |

In-house metabolite library. Samples with differed more 4SD from the mean after normalization were excluded from analyses.

**Table S2. Cox proportional hazard models associating metabolite levels with risk for incident atrial fibrillation.**

| Metabolite                      | P model 1 | p_fdr model 1 | HR model 1 | 95% lowint | 95% highint | p model 2 | HR model 2 | 95% lowint | 95% highint |
|---------------------------------|-----------|---------------|------------|------------|-------------|-----------|------------|------------|-------------|
| Caffeine                        | 3E-05     | 0.003         | 1.21       | 1.10       | 1.32        | 0.0012    | 1.17       | 1.06       | 1.28        |
| Acylcarnitine C16:1             | 7E-05     | 0.004         | 1.18       | 1.09       | 1.28        | 0.0044    | 1.13       | 1.04       | 1.23        |
| Acylcarnitine C14:0             | 0.0002    | 0.009         | 1.16       | 1.07       | 1.26        | 0.0024    | 1.14       | 1.05       | 1.24        |
| Acylcarnitine C2:0              | 0.0005    | 0.01          | 1.15       | 1.06       | 1.25        | 0.06      | 1.09       | 1.00       | 1.18        |
| Acisoga                         | 0.0005    | 0.01          | 1.15       | 1.06       | 1.24        | 0.05      | 1.08       | 1.00       | 1.18        |
| Beta-carotene                   | 0.0006    | 0.01          | 0.86       | 0.79       | 0.94        | 0.02      | 0.90       | 0.82       | 0.99        |
| Acylcarnitine C16:0             | 0.0009    | 0.01          | 1.14       | 1.06       | 1.23        | 0.05      | 1.09       | 1.00       | 1.18        |
| Acylcarnitine C14:1             | 0.0009    | 0.01          | 1.15       | 1.06       | 1.24        | 0.007     | 1.12       | 1.03       | 1.22        |
| Acylcarnitine C8:1              | 0.002     | 0.02          | 1.14       | 1.05       | 1.23        | 0.05      | 1.09       | 1.00       | 1.19        |
| Ergothioneine                   | 0.002     | 0.03          | 1.15       | 1.05       | 1.25        | 0.1       | 1.08       | 0.98       | 1.19        |
| Acylcarnitine C12:0             | 0.003     | 0.03          | 1.13       | 1.04       | 1.22        | 0.01      | 1.11       | 1.03       | 1.21        |
| Acylcarnitine C18:1             | 0.003     | 0.03          | 1.13       | 1.04       | 1.22        | 0.03      | 1.10       | 1.01       | 1.19        |
| N2.N2.Dimethylguanosine         | 0.003     | 0.03          | 1.12       | 1.04       | 1.21        | 0.8       | 1.01       | 0.93       | 1.10        |
| Acylcarnitine C8:0-OH           | 0.004     | 0.03          | 1.14       | 1.04       | 1.24        | 0.03      | 1.10       | 1.01       | 1.21        |
| Acylcarnitine C12:1             | 0.006     | 0.05          | 1.12       | 1.03       | 1.21        | 0.06      | 1.08       | 1.00       | 1.18        |
| Isoleucine                      | 0.007     | 0.05          | 1.12       | 1.03       | 1.22        |           |            |            |             |
| Trimethylamine-N-oxide          | 0.009     | 0.06          | 1.15       | 1.04       | 1.28        |           |            |            |             |
| Acylcarnitine C13:0             | 0.01      | 0.08          | 1.11       | 1.02       | 1.20        |           |            |            |             |
| Acylcarnitine C11:1             | 0.01      | 0.09          | 1.10       | 1.02       | 1.20        |           |            |            |             |
| Acetylcarnosine                 | 0.02      | 0.09          | 0.88       | 0.79       | 0.98        |           |            |            |             |
| Acylcarnitine C10:0-OH          | 0.02      | 0.1           | 1.10       | 1.02       | 1.19        |           |            |            |             |
| 1-Methyladenosine               | 0.02      | 0.1           | 1.10       | 1.02       | 1.19        |           |            |            |             |
| Trimethyllysine                 | 0.02      | 0.1           | 1.14       | 1.02       | 1.27        |           |            |            |             |
| Acylcarnitine C13:1             | 0.02      | 0.1           | 1.10       | 1.02       | 1.20        |           |            |            |             |
| Acylcarnitine C10:3             | 0.02      | 0.1           | 1.11       | 1.01       | 1.21        |           |            |            |             |
| Acylcarnitine C6:0              | 0.02      | 0.1           | 1.11       | 1.01       | 1.21        |           |            |            |             |
| Paraxanthine                    | 0.03      | 0.1           | 1.10       | 1.01       | 1.19        |           |            |            |             |
| 7-Methylguanine                 | 0.03      | 0.1           | 1.09       | 1.01       | 1.18        |           |            |            |             |
| Glutamate                       | 0.03      | 0.1           | 1.09       | 1.01       | 1.18        |           |            |            |             |
| Acylcarnitine C18:2             | 0.03      | 0.1           | 1.09       | 1.01       | 1.18        |           |            |            |             |
| 1-Methylhistidine               | 0.03      | 0.1           | 1.09       | 1.01       | 1.19        |           |            |            |             |
| Taurine                         | 0.04      | 0.1           | 1.09       | 1.01       | 1.18        |           |            |            |             |
| Acylcarnitine C8:0              | 0.04      | 0.1           | 1.10       | 1.01       | 1.20        |           |            |            |             |
| Acylcarnitine C10:2             | 0.04      | 0.1           | 1.10       | 1.00       | 1.20        |           |            |            |             |
| 4-Trimethylammoniobutanoic acid | 0.04      | 0.1           | 0.91       | 0.84       | 1.00        |           |            |            |             |

|                                      |      |     |      |      |      |  |  |  |  |
|--------------------------------------|------|-----|------|------|------|--|--|--|--|
| Kynurenine                           | 0.04 | 0.1 | 1.09 | 1.00 | 1.18 |  |  |  |  |
| 25-Hydroxyvitamin D3                 | 0.05 | 0.1 | 1.09 | 1.00 | 1.19 |  |  |  |  |
| Hypoxanthine                         | 0.06 | 0.2 | 1.08 | 1.00 | 1.17 |  |  |  |  |
| Acylcarnitine C10:0                  | 0.07 | 0.2 | 1.08 | 0.99 | 1.18 |  |  |  |  |
| 5-Acetylamino-6-amino-3-methyluracil | 0.07 | 0.2 | 1.09 | 0.99 | 1.20 |  |  |  |  |
| Guanidineacetate                     | 0.09 | 0.3 | 0.93 | 0.85 | 1.01 |  |  |  |  |
| DMGV                                 | 0.09 | 0.3 | 1.07 | 0.99 | 1.17 |  |  |  |  |
| Glutamine                            | 0.1  | 0.3 | 0.94 | 0.87 | 1.01 |  |  |  |  |
| Glycerophosphocholine                | 0.1  | 0.3 | 0.93 | 0.86 | 1.02 |  |  |  |  |
| Cystine                              | 0.1  | 0.3 | 1.06 | 0.99 | 1.15 |  |  |  |  |
| Methionine.S.oxide                   | 0.1  | 0.3 | 1.13 | 0.97 | 1.32 |  |  |  |  |
| Acylcarnitine C14:2                  | 0.1  | 0.3 | 1.07 | 0.98 | 1.16 |  |  |  |  |
| Acylcarnitine C12:2                  | 0.1  | 0.3 | 1.07 | 0.98 | 1.15 |  |  |  |  |
| Dimethyllysine                       | 0.1  | 0.3 | 1.06 | 0.98 | 1.15 |  |  |  |  |
| 2-Aminoisobutyric acid               | 0.1  | 0.3 | 1.07 | 0.98 | 1.17 |  |  |  |  |
| 5-Methylthioadenosine                | 0.2  | 0.3 | 0.94 | 0.87 | 1.02 |  |  |  |  |
| Acylcarnitine C5:0                   | 0.2  | 0.3 | 1.07 | 0.98 | 1.16 |  |  |  |  |
| Methyllysine                         | 0.2  | 0.3 | 1.05 | 0.98 | 1.14 |  |  |  |  |
| Creatine                             | 0.2  | 0.3 | 1.06 | 0.97 | 1.16 |  |  |  |  |
| Leucine                              | 0.2  | 0.3 | 1.06 | 0.97 | 1.16 |  |  |  |  |
| Choline                              | 0.2  | 0.3 | 1.06 | 0.98 | 1.15 |  |  |  |  |
| Hydroxycotinine                      | 0.2  | 0.3 | 0.73 | 0.46 | 1.15 |  |  |  |  |
| Acetylorntithine                     | 0.2  | 0.3 | 0.94 | 0.86 | 1.03 |  |  |  |  |
| Kynurenate                           | 0.2  | 0.4 | 1.06 | 0.97 | 1.16 |  |  |  |  |
| Tyrosine                             | 0.2  | 0.4 | 1.06 | 0.96 | 1.17 |  |  |  |  |
| Homocitrulline                       | 0.2  | 0.4 | 1.05 | 0.97 | 1.15 |  |  |  |  |
| Phenylacetylglutamine                | 0.2  | 0.4 | 0.95 | 0.87 | 1.04 |  |  |  |  |
| Trigonelline                         | 0.2  | 0.4 | 1.06 | 0.96 | 1.16 |  |  |  |  |
| NMMA                                 | 0.3  | 0.4 | 1.05 | 0.97 | 1.14 |  |  |  |  |
| Piperine                             | 0.3  | 0.4 | 1.06 | 0.96 | 1.16 |  |  |  |  |
| Methylnicotinamide                   | 0.3  | 0.5 | 0.95 | 0.86 | 1.04 |  |  |  |  |
| Pipecolate                           | 0.3  | 0.5 | 1.07 | 0.95 | 1.21 |  |  |  |  |
| Proline betaine                      | 0.3  | 0.5 | 0.95 | 0.87 | 1.04 |  |  |  |  |
| N.Methylproline                      | 0.3  | 0.5 | 0.95 | 0.87 | 1.05 |  |  |  |  |
| Acylcarnitine C4:0                   | 0.3  | 0.5 | 1.05 | 0.95 | 1.15 |  |  |  |  |
| Ornithine                            | 0.4  | 0.6 | 1.04 | 0.96 | 1.13 |  |  |  |  |
| Tiglylcarnitine                      | 0.4  | 0.6 | 1.04 | 0.95 | 1.14 |  |  |  |  |
| Asymmetric dimethylarginine          | 0.4  | 0.6 | 1.04 | 0.96 | 1.13 |  |  |  |  |
| Asparagine                           | 0.4  | 0.6 | 0.96 | 0.89 | 1.05 |  |  |  |  |

|                                          |     |     |      |      |      |  |  |  |  |
|------------------------------------------|-----|-----|------|------|------|--|--|--|--|
| <b>Pyroglutamate</b>                     | 0.4 | 0.6 | 0.96 | 0.89 | 1.05 |  |  |  |  |
| <b>Urocanate</b>                         | 0.4 | 0.6 | 0.96 | 0.87 | 1.06 |  |  |  |  |
| <b>Acylcarnitine C3:0</b>                | 0.4 | 0.6 | 0.97 | 0.88 | 1.05 |  |  |  |  |
| <b>Threonine</b>                         | 0.5 | 0.7 | 0.97 | 0.88 | 1.06 |  |  |  |  |
| <b>3-Hydroxytrimethyllysine</b>          | 0.5 | 0.7 | 1.03 | 0.95 | 1.13 |  |  |  |  |
| <b>Nicotinamide</b>                      | 0.5 | 0.7 | 1.03 | 0.94 | 1.13 |  |  |  |  |
| <b>Valine</b>                            | 0.5 | 0.7 | 1.03 | 0.95 | 1.11 |  |  |  |  |
| <b>Tryptophan</b>                        | 0.5 | 0.7 | 1.03 | 0.95 | 1.11 |  |  |  |  |
| <b>Homoarginine</b>                      | 0.5 | 0.7 | 0.97 | 0.89 | 1.06 |  |  |  |  |
| <b>N-Methyl-4-pyridone-3-carboxamide</b> | 0.5 | 0.7 | 1.03 | 0.93 | 1.15 |  |  |  |  |
| <b>Phenylalanine</b>                     | 0.6 | 0.7 | 1.02 | 0.94 | 1.11 |  |  |  |  |
| <b>Creatinine</b>                        | 0.6 | 0.7 | 0.97 | 0.89 | 1.07 |  |  |  |  |
| <b>Carnitine</b>                         | 0.6 | 0.7 | 0.96 | 0.84 | 1.10 |  |  |  |  |
| <b>Histidine</b>                         | 0.6 | 0.7 | 0.98 | 0.90 | 1.06 |  |  |  |  |
| <b>Arginine</b>                          | 0.6 | 0.7 | 0.98 | 0.90 | 1.06 |  |  |  |  |
| <b>3-Methylhistidine</b>                 | 0.6 | 0.8 | 1.02 | 0.94 | 1.12 |  |  |  |  |
| <b>Citrulline</b>                        | 0.6 | 0.8 | 0.98 | 0.90 | 1.07 |  |  |  |  |
| <b>Methionine</b>                        | 0.7 | 0.8 | 0.98 | 0.91 | 1.07 |  |  |  |  |
| <b>Homostachydrine</b>                   | 0.7 | 0.8 | 1.02 | 0.93 | 1.13 |  |  |  |  |
| <b>N-Methyl-2-pyridone-5-carboxamide</b> | 0.8 | 0.9 | 1.02 | 0.91 | 1.14 |  |  |  |  |
| <b>Alanine</b>                           | 0.8 | 0.9 | 1.01 | 0.93 | 1.10 |  |  |  |  |
| <b>Dimethylglycine</b>                   | 0.8 | 0.9 | 1.01 | 0.92 | 1.11 |  |  |  |  |
| <b>Hippurate</b>                         | 0.8 | 0.9 | 0.99 | 0.91 | 1.08 |  |  |  |  |
| <b>Acylcarnitine C18:0</b>               | 0.8 | 0.9 | 1.01 | 0.92 | 1.10 |  |  |  |  |
| <b>Symmetric dimethylarginine</b>        | 0.8 | 0.9 | 1.01 | 0.92 | 1.11 |  |  |  |  |
| <b>Acylcarnitine C10:1</b>               | 0.9 | 0.9 | 1.01 | 0.92 | 1.10 |  |  |  |  |
| <b>Betaine</b>                           | 0.9 | 0.9 | 1.01 | 0.92 | 1.10 |  |  |  |  |
| <b>Serine</b>                            | 0.9 | 0.9 | 1.01 | 0.93 | 1.09 |  |  |  |  |
| <b>Acylcarnitine C9:0</b>                | 0.9 | 0.9 | 0.99 | 0.91 | 1.08 |  |  |  |  |
| <b>Proline</b>                           | 0.9 | 0.9 | 1.01 | 0.92 | 1.10 |  |  |  |  |
| <b>Pantothenate</b>                      | 0.9 | 1.0 | 1.01 | 0.91 | 1.12 |  |  |  |  |
| <b>Lysine</b>                            | 0.9 | 1.0 | 1.00 | 0.92 | 1.08 |  |  |  |  |
| <b>Cotinine</b>                          | 0.9 | 1.0 | 1.01 | 0.87 | 1.16 |  |  |  |  |
| <b>Acetylarginine</b>                    | 0.9 | 1.0 | 1.00 | 0.93 | 1.09 |  |  |  |  |
| <b>Urea</b>                              | 0.9 | 1.0 | 1.00 | 0.92 | 1.09 |  |  |  |  |
| <b>Acylcarnitine C11:0</b>               | 1.0 | 1.0 | 1.00 | 0.92 | 1.08 |  |  |  |  |
| <b>Acylcarnitine C4:0-OH</b>             | 1.0 | 1.0 | 1.00 | 0.90 | 1.11 |  |  |  |  |
| <b>Sarcosine</b>                         | 1.0 | 1.0 | 1.00 | 0.91 | 1.10 |  |  |  |  |

Atrial Fibrillation incidence, n = 650

Model 1: Adjusted for sex and age

Model 2: adjusted for sex, age, body mass index (BMI), baseline smoking status, systolic blood pressure, alcohol intake, usage of anti-hypertensive medicine, N-terminal pro b-type natriuretic peptide, prevalent diabetes mellitus, prevalent heart failure and prevalent ischemic heart disease

HR = Hazard Ratio

95% lowint = 95% confidence interval, lower

95% highint = 95% confidence interval, higher



**Table S3. Cox proportional hazard models further adjusted.**

| <b>Metabolites</b>             | <b>p</b> | <b>HR</b> | <b>95%<br/>lowint</b> | <b>95%<br/>highint</b> |
|--------------------------------|----------|-----------|-----------------------|------------------------|
| <b>Caffeine</b>                | 0.0014   | 1.16      | 1.06                  | 1.28                   |
| <b>Acylcarnitine.16:1</b>      | 0.0021   | 1.14      | 1.05                  | 1.24                   |
| <b>Acylcarnitine.14:0</b>      | 0.0018   | 1.14      | 1.05                  | 1.24                   |
| <b>Acylcarnitine.2:0</b>       | 0.03     | 1.10      | 1.01                  | 1.19                   |
| <b>Acisoga</b>                 | 0.07     | 1.08      | 0.99                  | 1.17                   |
| <b>Beta.carotene</b>           | 0.02     | 0.90      | 0.82                  | 0.98                   |
| <b>Acylcarnitine.16:0</b>      | 0.04     | 1.09      | 1.00                  | 1.18                   |
| <b>Acylcarnitine.14:1</b>      | 0.004    | 1.13      | 1.04                  | 1.23                   |
| <b>Acylcarnitine.8:1</b>       | 0.06     | 1.08      | 1.00                  | 1.18                   |
| <b>Ergothioneine</b>           | 0.05     | 1.10      | 1.00                  | 1.20                   |
| <b>Acylcarnitine.12:0</b>      | 0.01     | 1.12      | 1.03                  | 1.21                   |
| <b>Acylcarnitine.18:1</b>      | 0.02     | 1.11      | 1.02                  | 1.20                   |
| <b>N2,N2-Dimethylguanosine</b> | 0.54     | 1.03      | 0.94                  | 1.12                   |
| <b>Acylcarnitine.8:0:OH</b>    | 0.02     | 1.11      | 1.02                  | 1.22                   |
| <b>Acylcarnitine.12:1</b>      | 0.05     | 1.09      | 1.00                  | 1.18                   |

Cox proportional hazard models adjusted for sex, age, body mass index (BMI), baseline smoking status, systolic blood pressure, alcohol intake, usage of anti-hypertensive medicine, N-terminal pro b-type natriuretic peptide, prevalent diabetes mellitus, prevalent heart failure, prevalent ischemic heart disease, prevalent cancer, prevalent chronic obstructive pulmonary disease and estimated GFR.

HR = Hazard ratio

95 % lowint = 95% confidence interval, lower

95% highint = 95% confidence interval, higher

**Table S4. Cox proportional hazard models for cardioembolic stroke.**

| Metabolites                 | p    | p_fdr | HR   | 95%<br>lowint | 95%<br>highint | P<br>model<br>2 | HR<br>model<br>2 | 95%<br>lowint<br>model<br>2 | 95%<br>highint<br>model<br>2 |
|-----------------------------|------|-------|------|---------------|----------------|-----------------|------------------|-----------------------------|------------------------------|
| Caffeine                    | 0.03 | 0.47  | 1.30 | 1.02          | 1.65           | 0.05            | 1.29             | 1.00                        | 1.67                         |
| Beta carotene               | 0.20 | 0.47  | 0.85 | 0.67          | 1.08           | 0.15            | 0.82             | 0.62                        | 1.07                         |
| Acisoga                     | 0.20 | 0.47  | 1.15 | 0.93          | 1.42           | 0.91            | 1.01             | 0.80                        | 1.28                         |
| Acylcarnitine 8:0:OH        | 0.20 | 0.47  | 1.17 | 0.92          | 1.48           | 0.16            | 1.19             | 0.93                        | 1.53                         |
| Acylcarnitine 16:1          | 0.21 | 0.47  | 1.15 | 0.92          | 1.45           | 0.27            | 1.15             | 0.90                        | 1.47                         |
| Acylcarnitine 14:1          | 0.23 | 0.47  | 1.15 | 0.91          | 1.44           | 0.26            | 1.15             | 0.90                        | 1.47                         |
| Acylcarnitine 12:0          | 0.30 | 0.47  | 1.12 | 0.90          | 1.40           | 0.26            | 1.15             | 0.90                        | 1.45                         |
| N2,N2-<br>Dimethylguanosine | 0.33 | 0.47  | 1.11 | 0.90          | 1.38           | 0.73            | 1.04             | 0.82                        | 1.32                         |
| Acylcarnitine 18:1          | 0.33 | 0.47  | 1.12 | 0.89          | 1.39           | 0.22            | 1.16             | 0.91                        | 1.47                         |
| Acylcarnitine 2:0           | 0.33 | 0.47  | 1.12 | 0.89          | 1.40           | 0.53            | 1.08             | 0.84                        | 1.39                         |
| Acylcarnitine 12:1          | 0.34 | 0.47  | 1.12 | 0.89          | 1.40           | 0.43            | 1.10             | 0.86                        | 1.41                         |
| Acylcarnitine 14:0          | 0.42 | 0.50  | 1.10 | 0.87          | 1.38           | 0.52            | 1.08             | 0.85                        | 1.39                         |
| Acylcarnitine 8:1           | 0.43 | 0.50  | 1.09 | 0.87          | 1.37           | 0.51            | 1.08             | 0.85                        | 1.39                         |
| Acylcarnitine 16:0          | 0.66 | 0.70  | 1.05 | 0.84          | 1.31           | 0.90            | 1.02             | 0.79                        | 1.31                         |
| Ergothioneine               | 0.82 | 0.82  | 1.03 | 0.80          | 1.34           | 0.65            | 0.93             | 0.70                        | 1.25                         |

Cardioembolic stroke incidence, n = 83

Model 1: Adjusted for sex and age

Model 2: adjusted for sex, age, body mass index (BMI), baseline smoking status, systolic blood pressure, alcohol intake, usage of anti-hypertensive medicine, LDL cholesterol, HDL cholesterol, prevalent diabetes mellitus, prevalent hear failure and prevalent ischemic heart disease.

HR = Hazard ratio

95% lowint = 95% confidence interval, lower

95% highint = 95% confidence interval, higher
